# Supplementary material for: Phosphorylated Fish Gelatin and the Quality of Jelly Gels: Gelling and Microbiomics Analysis
Source: MDPI journal article supplement (doi:10.3390/foods12193682), 2023-10-07
Supplement: s1 [file s1]

**Table S1** Specific composition of the JGs

| Sample name                | Gelatin(w/v) | Other ingredients(w/v) |
|----------------------------|--------------|------------------------|
| FG:κC (2:1), /PFG:κC (2:1) | 0.67% FG     | Sodium citrate 0.1%    |
|                            | 0.33% κC     | Green tea essence 0.1% |
| FG:κC (1:1) /PFG:κC (1:1)  | 0.5% FG      | potassium sorbate 0.1% |
|                            | 0.5% κC      | maltitol 18%           |
| FG:κC (1:2)/PFG:κC (1:2)   | 0.33% FG     | skim milk powder 16%   |
|                            | 0.67% κC     |                        |

**Table S2** Sensory scoring criteria

| Project                         | Grading                                                       | Score |
|---------------------------------|---------------------------------------------------------------|-------|
| Color (15 points)               | Uniform milky white or slightly yellowish                     | 10-15 |
|                                 | Lighter milky white or Light yellow color slightly darker     | 5-10  |
|                                 | The color is too dark and uneven                              | 0-5   |
| Taste (30 points)               | Smooth and tender taste with milky flavor                     | 20-30 |
|                                 | Smooth and tender taste with no or less milk flavor           | 10-20 |
|                                 | The taste is rough and have great toughness                   | 0-10  |
| Textural acceptance (30 points) | Gelatinous, The texture is more uniform and soft and delicate | 20-30 |
|                                 | Medium                                                        | 10-20 |
|                                 | Not gelatinous, uneven texture and too soft or too hard       | 0-10  |
| Hardness (15 points)            | Good                                                          | 10-15 |
|                                 | Rough                                                         | 5-10  |
|                                 | Slightly worse                                                | 0-5   |
| Elasticity (10 points)          | Good elasticity                                               | 7-10  |
|                                 | Slightly lack of flexibility                                  | 4-7   |
|                                 | General or poor elasticity                                    | 1-4   |

**Table S3 Changes in the total number of colonies in JGs**

| <b>Storage time/day</b> | <b>Sample name</b> | <b>Total number of colonies/CFU/g</b> | <b>Sample name</b> | <b>Total number of colonies/CFU/g</b> |
|-------------------------|--------------------|---------------------------------------|--------------------|---------------------------------------|
| 0                       | FG:κC (2:1)        | 15.0                                  | PFG:κC (2:1)       | 33.3                                  |
|                         | FG:κC (1:1)        | 20.0                                  | PFG:κC (1:1)       | 33.3                                  |
|                         | FG:κC (1:2)        | 23.3                                  | PFG:κC (1:2)       | 40.0                                  |
| 7                       | FG:κC (1:2)        | 33.3                                  | PFG:κC (1:2)       | 80.0                                  |
| 14                      | FG:κC (1:2)        | 70.0                                  | PFG:κC (1:2)       | 133.3                                 |
